# Supplementary material
Source: Springer Nature journal article supplement (https://www.springermedizin.de/resource/supplementary/12885_2013_4787_MOESM5_ESM.pdf/9467302)

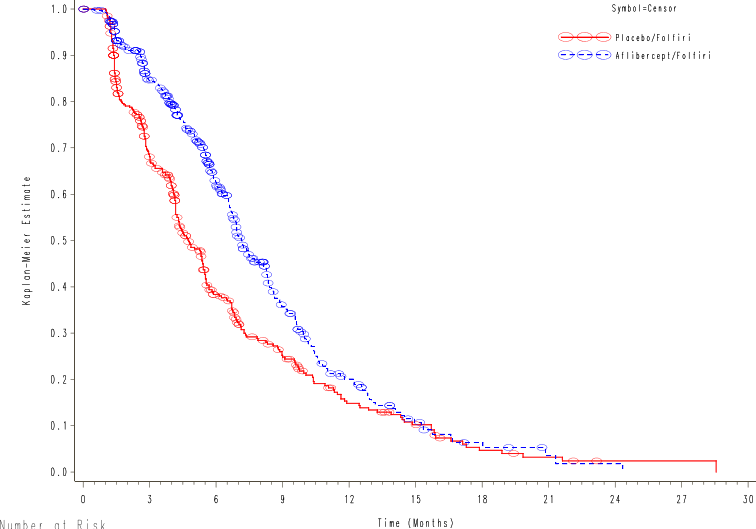

Number at Risk

Time (Months)

|         |     |     |     |    |    |    |   |   |   |   |   |
|---------|-----|-----|-----|----|----|----|---|---|---|---|---|
| Placebo | 406 | 244 | 111 | 62 | 31 | 19 | 7 | 4 | 1 | 1 | 0 |
| AFI     | 404 | 299 | 177 | 75 | 34 | 14 | 6 | 2 | 1 | 0 | 0 |

Supplement: MOESM5 [file 9467302]
